# Supplementary material for: The role of Rho GTPase in cell stiffness and cisplatin resistance in ovarian cancer cells
Source: Royal Society of Chemistry journal article supplement (doi:10.1039/c3ib40246k), 2014-01-01
Supplement: c3ib40246k1.pdf [file c3ib40246k1.pdf]

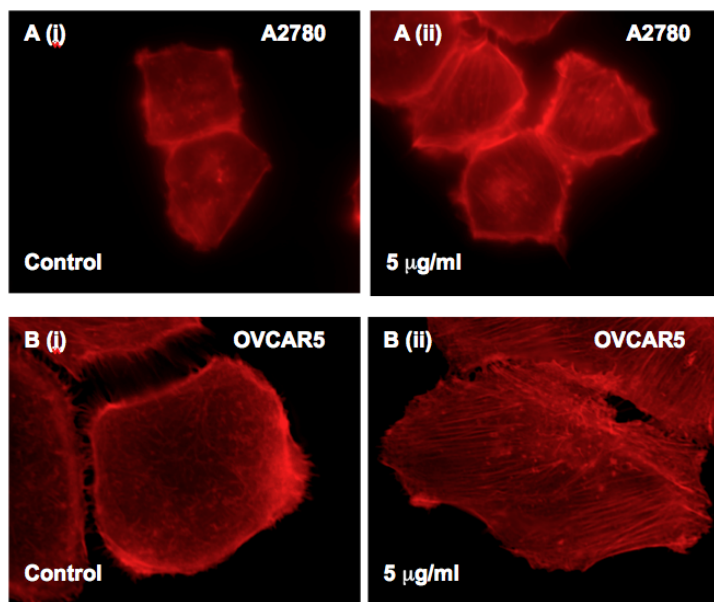

**Fig. S1** Cisplatin treatment shows increased actin cytoskeleton in A2780 and OVCAR5 cells (A) A2780 control cells (i) and 5µg/ml cisplatin treated cells (ii) and (B) OVCAR5 control cells (i) and 5µg/ml cisplatin treated cells (ii) showing changes in actin organization.

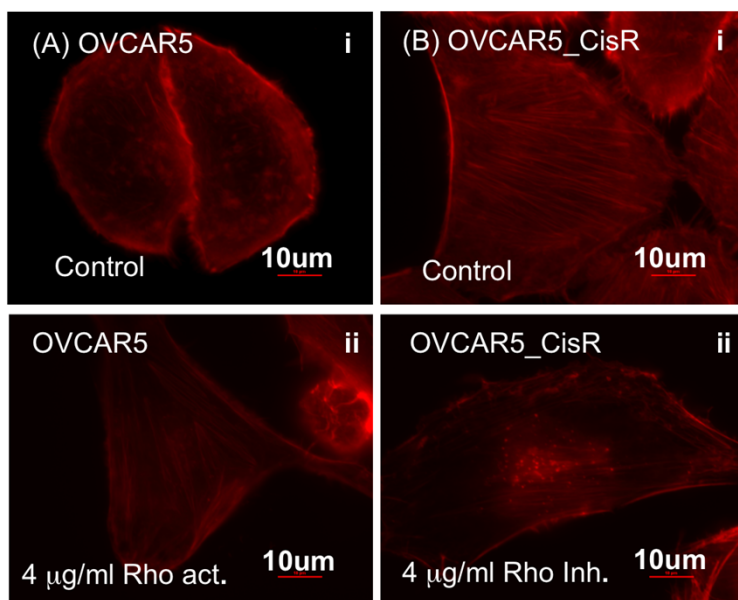

**Fig. S2** Effect of Rho Activator and Rho Inhibitor observed on actin organization of OVCAR5 and OVCAR5\_CisR cells (A) Actin cytoskeleton of (i) untreated and (ii) Rho Activator II treated OVCAR5 cells showing increased stress fibres (B) actin cytoskeleton of (i) untreated and (ii) Rho Inhibitor treated OVCAR5\_CisR cells respectively.
